# Supplementary material for: Ligand-assisted morphology regulation of AuNi bimetallic nanocrystals for efficient hydrogen evolution
Source: Royal Society of Chemistry journal article supplement (doi:10.1039/d2ra06325e), 2023-01-01
Supplement: d2ra06325e1.pdf [file d2ra06325e1.pdf]

## Supporting Information

### **Ligand-Assisted Morphology Regulation of AuNi Bimetallic Nanocrystals for Efficient Hydrogen Evolution**

Chu Zhang, Can Xue

School of Materials Science and Engineering, Nanyang Technological University, 50 Nanyang avenue, 639798 Singapore.

#### **Synthesis of Au NPs**

In a typical synthesis, 0.1 mmol  $\text{HAuCl}_4$  dispersed in 0.2 ml ethanol was injected to a round-bottom flask containing 7 ml OAm at 120 °C under vigorous stirring. Upon injection, the solution turned black red in colour over a period of one minutes, indicating the nucleation of Au. The solution was kept stirring at this temperature for 1 h. After cooling down to room temperature naturally, the mixture was precipitated by excess ethanol, which was isolated and collected via centrifugation. The obtained precipitate was then washed with a mixture of hexane and ethanol, and redispersed in hexane.

#### **Synthesis of Ni NPs**

Typically, 0.5 mmol of  $\text{Ni}(\text{acac})_2$  and 0.5 mmol TOP were added to 7 ml of OAm at 80 °C. After completely dissolution of all reagents, the mixture was heated to 210 °C and kept at that temperature for 1h with continuous mechanical stirring. After cooling down naturally, the mixed solution was precipitated by ethanol, which was isolated and collected through centrifugation. The obtained precipitate was then washed with a mixture of hexane and ethanol, and redispersed in hexane.

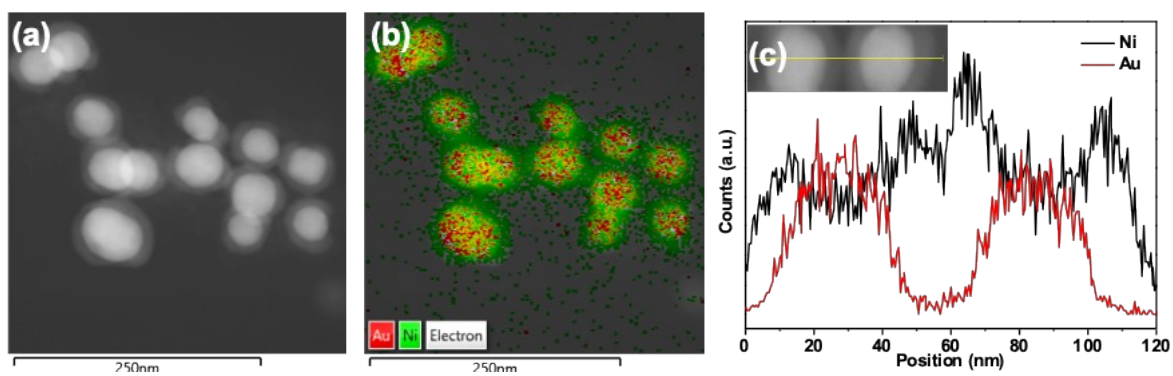

**Fig. S1** (a) HAADF image, (b) EDS mapping, (c) EDS line scanning of c-AuNi NCs

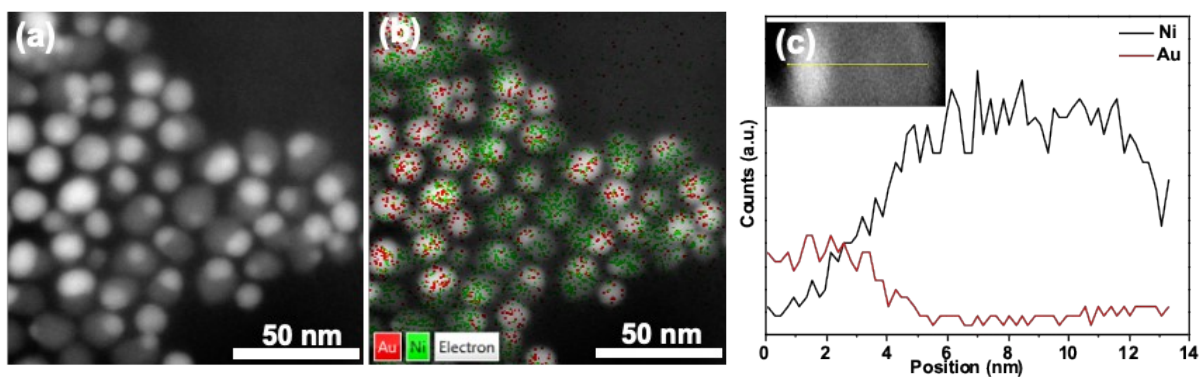

**Fig. S2** (a) HAADF image, (b) EDS mapping, (c) EDS line scanning of j-AuNi NCs.

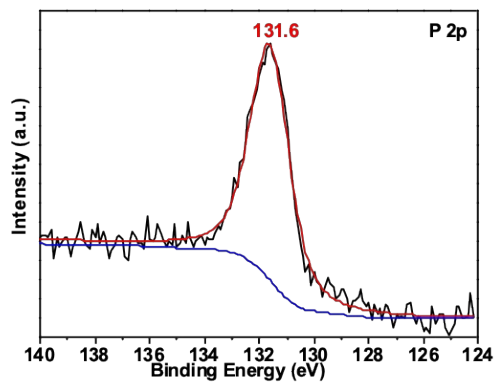

**Fig. S3** P 2p XPS spectra of c-AuNi NCs.

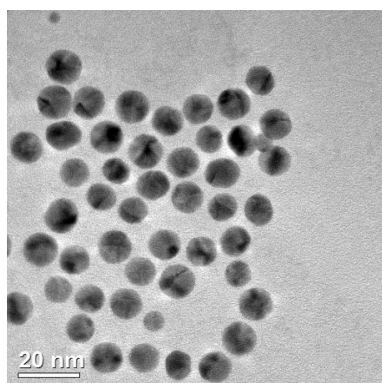

**Fig. S4** TEM images of the AuNi NCs without TPP

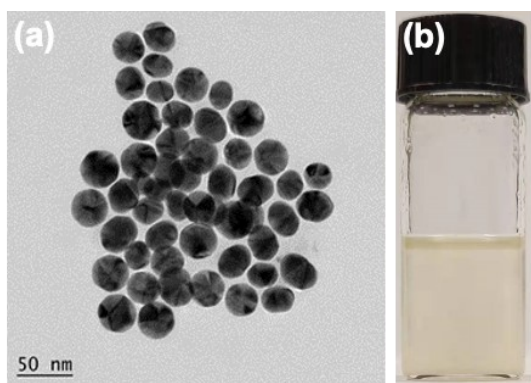

**Fig. S5** (a) TEM images of Au NPs with 0.2 mmol TPP, (b) photograph of white precipitates appeared in OAm.

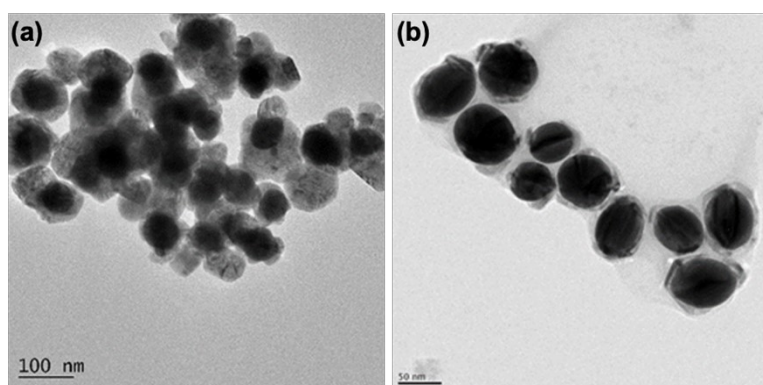

**Fig. S6** TEM images of c-AuNi NCs formed with different amount of Ni(acac)<sub>2</sub>. (a) 0.6 mmol, (b) 0.2 mmol

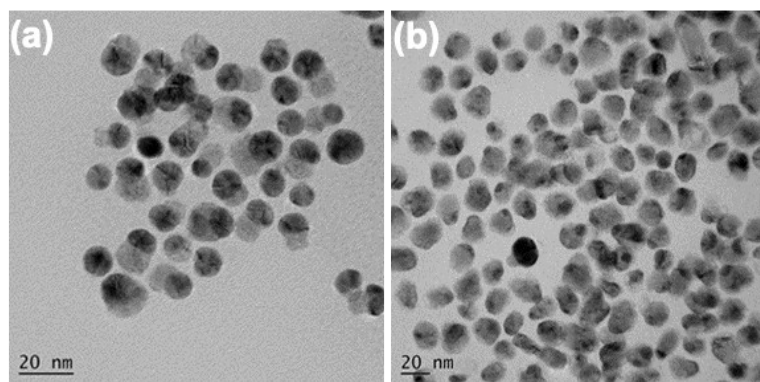

**Fig. S7** TEM images of j-AuNi NCs formed with different amount of Ni(acac)<sub>2</sub>. (a) 0.2 mmol, (b) 0.6 mmol.

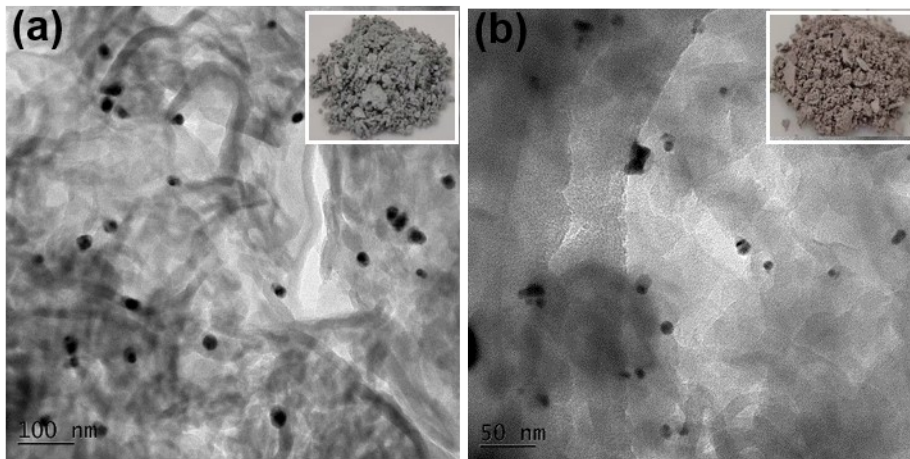

**Fig. S8** TEM image of (a) c-AuNi/GCN, (b) j-AuNi/GCN

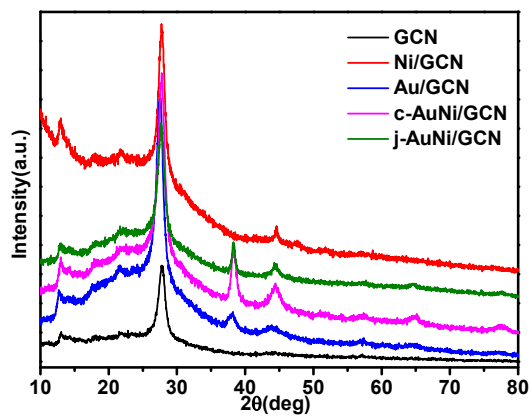

**Fig. S9** XRD patterns of metal/GCN nanohybrids

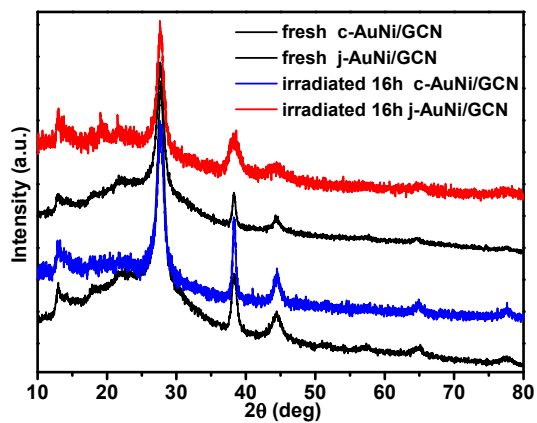

**Fig. S10** XRD patterns of c-AuNi/GCN and j-AuNi/GCN before and after cycling test.

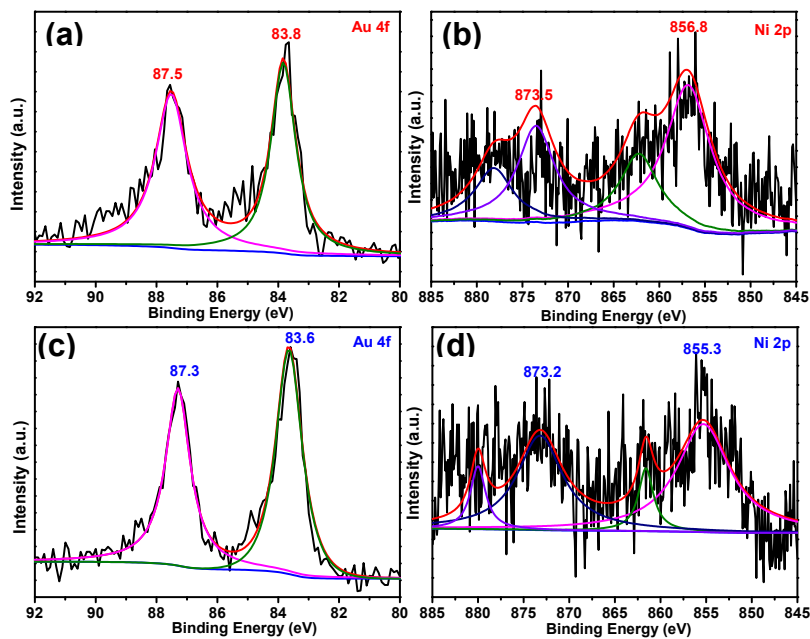

**Fig. S11** (a) Au 4f XPS spectrum, (b) Ni 2p XPS spectrum of j-AuNi/GCN. (c) Au 4f XPS spectrum, (d) Ni 2p XPS spectrum of c-AuNi/GCN after cycling test

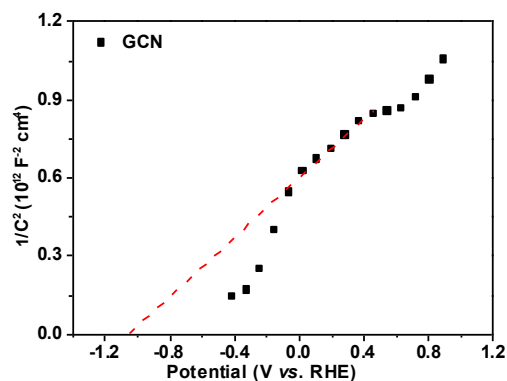

**Fig. S12** The Mott-Schottky plot of GCN

**Table S1.** Comparison of AQY for photocatalytic H<sub>2</sub> evolution (in 10% TEOA) on GCN-based photocatalysts with different cocatalysts in the literatures

| Cocatalysts       | AQY                                | Ref.                                           |
|-------------------|------------------------------------|------------------------------------------------|
| Pt                | 3.01% at 450 nm<br>0.82% at 500 nm | ACS Appl. Mater. Interfaces 2020, 12, 47, 5260 |
| NiS-Ag            | 1.21% at 420 nm                    | Chin. J. Catalysis, 2019, 40, 434              |
| Ni                | 2.01% at 400 nm                    | J. Mater. Chem. A, 2016, 4, 9998               |
| Ni <sub>3</sub> N | 2.3% at 420 nm                     | ACS Sustainable Chem. Eng. 2020, 8, 884        |
| W <sub>2</sub> C  | 1.52% at 420 nm                    | ChemSusChem, 2019, 12, 3355                    |
| AuNi              | 1.56% at 420 nm<br>0.72% at 550 nm | This work                                      |
